# Supplementary material for: Colorimetric detection of Hg2+ using thioctic acid functionalized gold nanoparticles
Source: Royal Society of Chemistry journal article supplement (doi:10.1039/c3ra43276a), 2013-01-01
Supplement: c3ra43276a.pdf [file c3ra43276a.pdf]

## Electronic Supplementary Information

### Colorimetric Detection of $\text{Hg}^{2+}$ Using Thioctic acid Functionalized Gold Nanoparticles

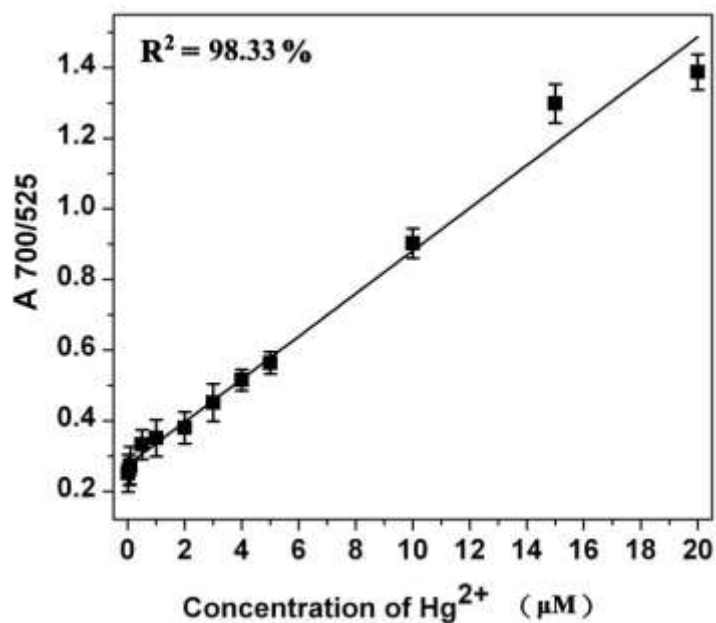

**Fig. S1.** Plot of  $A_{700/525}$  versus the concentrations of  $\text{Hg}^{2+}$  in the range of 0.01-20  $\mu\text{M}$ . The error bars represent standard deviations based on three independent measurements.

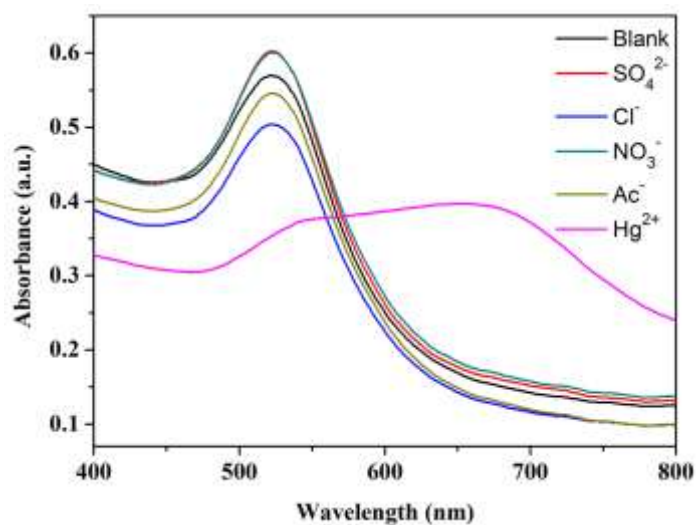

**Fig. S2.** UV-Vis spectra of TA-GNPs containing 50  $\mu\text{M}$  anions compared with  $\text{Hg}^{2+}$  20  $\mu\text{M}$ .

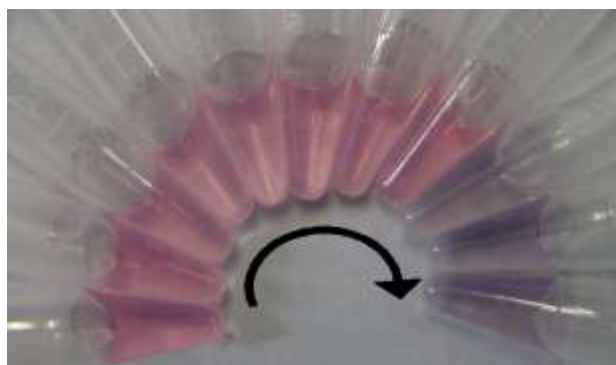

**Fig. S3.** Photo images of samples of TA-GNPs containing different concentrations of  $\text{Hg}^{2+}$  in lake water (orientation of the arrowhead: 10nM, 50nM, 100nM, 500nM, 1 $\mu\text{M}$ , 2 $\mu\text{M}$ , 3 $\mu\text{M}$ , 5 $\mu\text{M}$ , 10 $\mu\text{M}$ , 15 $\mu\text{M}$  and 20 $\mu\text{M}$ .)

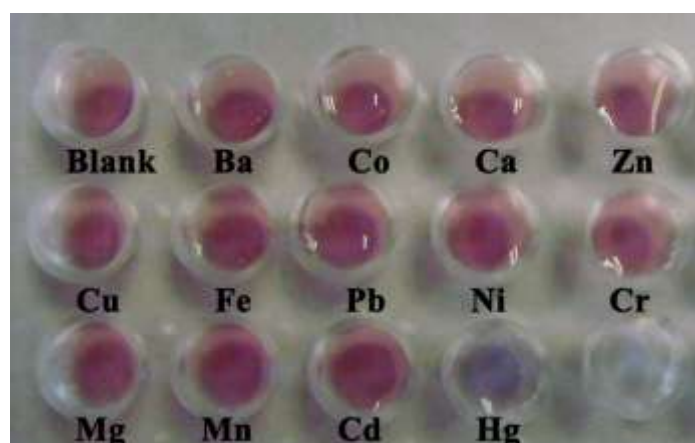

**Fig. S4.** Photo images of samples of TA-GNPs containing 50  $\mu\text{M}$  other metal ions ( $\text{Ba}^{2+}$ ,  $\text{Co}^{2+}$ ,  $\text{Ca}^{2+}$ ,  $\text{Zn}^{2+}$ ,  $\text{Cu}^{2+}$ ,  $\text{Fe}^{2+}$ ,  $\text{Pb}^{2+}$ ,  $\text{Ni}^{2+}$ ,  $\text{Cr}^{3+}$ ,  $\text{Mg}^{2+}$ ,  $\text{Mn}^{2+}$ ,  $\text{Cd}^{2+}$ ) compared with  $\text{Hg}^{2+}$  15  $\mu\text{M}$  in lake water.
